# Supplementary material for: Stringent Selection of Knobby Plasmodium falciparum-Infected Erythrocytes during Cytoadhesion at Febrile Temperature
Source: MDPI journal article supplement (doi:10.3390/microorganisms8020174), 2020-01-25
Supplement: s1 [file s1]

# SUPPLEMENTARY MATERIAL

Figure S1

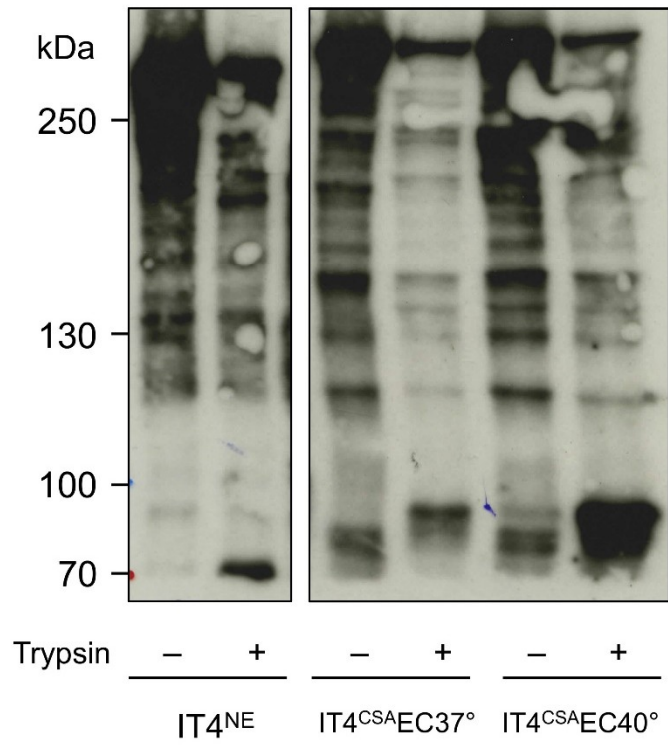

Figure S1: Western blot analysis for ATS was performed with trypsin-treated or untreated IEs and uninfected erythrocytes. All samples were solubilized in Laemmli sample buffer, separated by 6% SDS-PAGE, and analyzed by immunoblotting. Equivalents of  $3 \times 10^7$  cells were loaded in each lane. The ATS antibody detects surface *Pf*EMP1 as trypsin-cleaved intracellular ATS-residues.

## SUPPLEMENTARY MATERIAL

Figure S2

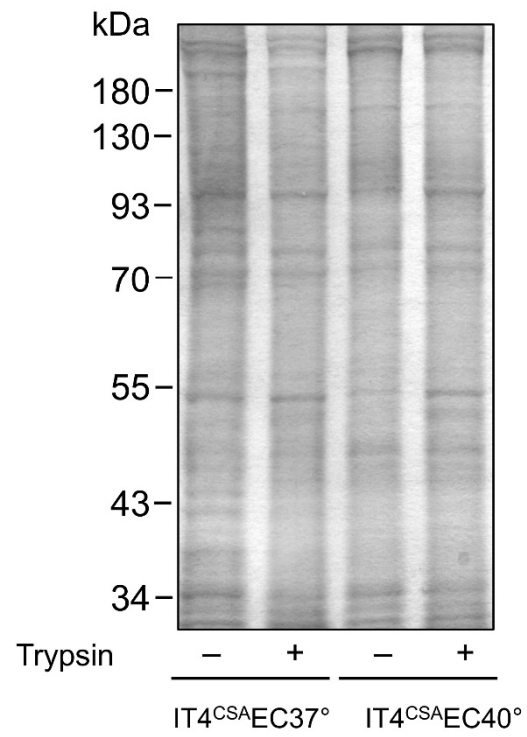

Figure S2: Coomassie-stained gel (10%) of membrane fractions (equivalents of  $1 \times 10^7$  cells were loaded in each lane) of IT4<sup>CSA</sup>EC37° and IT4<sup>CSA</sup>EC40° parasite populations (control for Figure. 2A)
